# Supplementary material for: Dynamics of locomotion in the seed harvesting ant Messor barbarus: effect of individual body mass and transported load mass
Source: PeerJ. 2021 Jan 29;9:e10664. doi: 10.7717/peerj.10664 (PMC7849507; doi:10.7717/peerj.10664)
Supplement: Supplemental Information 1 — Each line of the table gives the values of the different variables measured on the same ant in unloaded and loaded condition. [file peerj-09-10664-s001.xlsx]

## Sheet: Database
	mass_ant	mass_load	time_u	temp_u	time_l	temp_l	load_ratio	l_corps	angle_u	angle_l	distance_lineaire_parcourue_u	distance_lineaire_parcourue_l	travail_mecanique_u	travail_mecanique_l	travail_mecanique_div_masse_distance_u	travail_mecanique_div_masse_temps_u	travail_mecanique_div_masse_distance_l	travail_mecanique_div_masse_temps_l	nombre_foulees_u	nombre_foulees_l	longueur_foulee_u	longueur_foulee_l	vitesse_u	vitesse_l	percentage_congruity_u	percentage_congruity_l	coef_cor_u	coef_cor_l	percentage_recovery_u	percentage_recovery_l	amplitude_z_u	rmse_pos_z_u	rmse_vit_norm_u	amplitude_z_l	rmse_pos_z_l	rmse_vit_norm_l	mean_z_BL_u	mean_z_BL_l	dephasage_stat_kin_sur_pot_u	dephasage_stat_kin_sur_pot_l
	kg	kg	s	°C	s	°C	NA	m	°	°	m	m	J	J	J.kg-1.m-1	W.kg-1	J.kg-1.m-1	W.kg-1	NA	NA	m	m	m.s-1	m.s-1	%	%	NA	NA	%	%	m	m	m.s-1	m	m	m.s-1	body length	body length	°	°
	2.3e-05	2.37e-05	13.5	29.3	18.5	29.3	2.03043	0.030888	7.43482	6.05015	0.0332303	0.0356806	8.05e-07	4.14e-06	1.05299	0.0316947	2.65521	0.0598103	5	6	0.00664605	0.00594677	0.0300999	0.0225257	67.029	68.1818	0.580491	0.480594	8.06739	8.42385	0.000112718	8.81e-05	0.000122791	0.000281287	0.000105654	0.000126468	0.0992104	0.0764228	15.2862	42.4357
	1.22e-05	2.43e-05	13.5	29.3	17.75	29	2.9918	0.0218919	12.6019	2.98353	0.0322302	0.0261341	3.52e-07	1.36e-06	0.895049	0.0232642	1.4706	0.0206628	5	5	0.00644604	0.00522682	0.0259921	0.0140506	74.8387	59.7849	0.57372	0.338829	6.38587	8.55954	9.85e-05	0.000135521	8.8e-05	8.04e-05	0.00020139	0.000170042	0.100835	0.0806876	38.3875	20.6091
	9.8e-06	1.35e-05	13.5	29.3	17.75	29	2.37755	0.0190678	16.6076	7.13296	0.0322414	0.0145377	5.24e-07	8.45e-07	1.65797	0.0678368	2.67714	0.0417592	5	3	0.00644829	0.00484591	0.0409155	0.0155984	78.6802	63.5193	0.590178	0.500896	3.93238	7.16239	0.000173049	0.000163237	0.000145066	0.000159147	0.000176835	0.000111922	0.131344	0.0994317	11.1834	22.8968
	1.86e-05	3.71e-05	14.25	28.7	19	28.8	2.99462	0.0266684	15.9358	4.07953	0.0223955	0.0196919	3.97e-07	2.78e-06	0.95244	0.0313683	2.60195	0.029312	3	4	0.00746518	0.00492298	0.0329346	0.0112654	60.5882	57.8947	0.214071	0.729235	13.8077	4.0827	0.000108551	0.000142214	0.000201809	0.000153043	0.000219886	0.000221579	0.132388	0.0879254	20.7451	53.4121
	1.5e-05	1.41e-05	14.5	29.1	18.5	19.1	1.94	0.0245965	4.66035	5.35416	0.0332051	0.0243916	6.28e-07	1.11e-06	1.26032	0.0460893	1.60841	0.0333603	5	4	0.00664103	0.0060979	0.0365695	0.0207412	74.4493	63.9456	0.540276	0.598219	6.57865	8.45577	0.000138411	0.000150223	0.000124482	0.000156952	0.000140926	0.000104632	0.115647	0.103169	41.2929	36.0043
	1.19e-05	3.89e-05	10.5	28.4	18.5	19.1	4.26891	0.0207566	12.9441	4.27907	0.0277479	0.0196002	3.36e-07	2e-06	1.01724	0.0326693	2.01304	0.023598	4	4	0.00693698	0.00490004	0.0321157	0.0117226	62.037	61.244	0.48333	0.394945	12.9863	4.74055	0.000124428	0.000173467	0.000109177	8.53e-05	0.000185336	0.000131798	0.102947	0.085894	45.5434	31.6813
	2.83e-05	2.99e-05	10.25	26.9	15.5	27.6	2.05654	0.0351461	18.3565	7.69785	0.0335109	0.0183695	9.66e-07	2.27e-06	1.01817	0.0257702	2.19196	0.0358233	5	3	0.00670218	0.00459238	0.0253103	0.016343	55.8912	64.0569	0.139673	0.413338	12.3812	4.8578	9.74e-05	0.000246491	0.000139306	0.000112612	0.000196269	0.000158058	0.0968815	0.072106	49.7022	24.9812
	2.02e-05	5.98e-05	10.25	26.8	15.5	27.6	3.9604	0.0272291	8.3266	9.88023	0.0364866	0.0320259	8.23e-07	5.02e-06	1.11624	0.0342828	1.97515	0.0204315	5	6	0.00729732	0.00533766	0.0307126	0.0103443	54.5455	54.522	0.384099	0.278148	11.2878	5.55119	0.000126197	0.000114842	0.000161184	0.000123573	0.00020142	0.000144365	0.117477	0.101473	28.2361	0.908926
	1.34e-05	5.53e-05	11.5	27.8	15.5	27.6	5.12687	0.0213445	8.92416	2.65225	0.0295893	0.0285645	5.08e-07	3.7e-06	1.28032	0.049328	1.89588	0.0187777	4	6	0.00739733	0.00476074	0.0385277	0.00990446	65.625	50.3467	0.42921	0.0672612	9.54727	10.0278	0.000159789	0.000100683	0.000166774	4.5e-05	0.000268566	0.00021605	0.123621	0.0743867	23.7166	1.50396
	1.03e-05	1.99e-05	11.5	27.2	16.6	27.7	2.93204	0.0183248	21.2817	5.26545	0.0174007	0.0164584	1.92e-07	6.44e-07	1.06951	0.0238592	1.3545	0.0148619	3	4	0.00580023	0.00411459	0.0223086	0.0109722	65.1282	58.1333	0.0681547	0.238466	8.45074	6.20383	5e-05	0.000232466	0.000166456	8.68e-05	0.00017645	0.000122608	0.139536	0.11541	12.0254	23.117
	8.4e-06	3.14e-05	10.5	27.3	15.25	27.6	4.7381	0.0181562	9.06151	-3.20875	0.0178457	0.01439	1.31e-07	8.12e-07	0.872186	0.0181831	1.42192	0.0171082	3	3	0.00594856	0.00479666	0.0208478	0.0120318	64.0187	59.8662	0.472881	0.609625	7.10668	10.4796	9.05e-05	0.000199627	0.000123058	5.99e-05	0.000221422	0.000199809	0.143191	0.0942001	7.46762	-0.433071
	3.8e-06	1.2e-05	12.25	27.6	16.25	27.6	4.15789	0.010561	16.4203	-0.551211	0.0148252	0.0210249	5.43e-08	5.51e-07	0.96384	0.0264613	1.70205	0.0258566	3	5	0.00494172	0.00420499	0.027454	0.0151914	71.1111	67.6301	0.488151	0.679818	8.18247	5.21388	6.2e-05	0.000163509	0.00011638	8.45e-05	0.00015268	0.000147703	0.159324	0.103189	-5.59289	1.47865
	1.21e-05	1.23e-05	12.5	27	16.5	27.6	2.01653	0.0208171	12.6257	-5.18036	0.0216934	0.0161726	3.11e-07	5.88e-07	1.18611	0.0389862	1.56098	0.0360644	3	3	0.00723115	0.00539087	0.0328688	0.0231037	68.4848	62.8571	0.614433	0.568004	6.95287	9.09893	0.000131123	7.71e-05	0.000101509	0.000133282	0.000138533	0.000142439	0.109788	0.0837186	27.7639	38.129
	8e-06	3.01e-05	11	27.3	16.5	27.3	4.7625	0.0155578	16.6314	4.80726	0.0187511	0.0158228	1.55e-07	1.46e-06	1.0307	0.0328687	2.45747	0.0176746	3	5	0.00625036	0.00316457	0.0318896	0.0071922	78.2313	58.1818	0.596771	0.50813	6.31168	4.03134	8.84e-05	0.000197482	0.00017905	3.58e-05	0.000194753	0.000232909	0.150549	0.112504	-0.214471	-10.1786
	1.55e-05	4.69e-05	11	27.9	15.75	28.2	4.02581	0.0231288	13.3776	5.81112	0.0259353	0.0140763	4.2e-07	2.66e-06	1.04572	0.0262801	3.10235	0.0287301	4	3	0.00648382	0.00469212	0.0251311	0.00926075	66.6667	51.5789	0.56664	0.435042	7.17356	4.81836	0.000104032	0.000185892	8.6e-05	2.12e-05	0.000263777	0.000201005	0.0867985	0.0849302	13.0669	-57.2805
	7.4e-06	1.43e-05	10.5	28.2	16.5	28.3	2.93243	0.0157425	12.0758	2.52441	0.0166374	0.0235494	1.65e-07	1.05e-06	1.34214	0.0426139	2.09826	0.051258	3	4	0.0055458	0.00588736	0.0317508	0.0244289	67.1756	75.1037	0.568441	0.608259	7.96259	3.75311	0.000131355	0.000138507	0.000165945	0.00016165	0.000139925	7.7e-05	0.141221	0.0898659	34.496	21.4968
	7e-06	6e-06	13.75	27.9	16.5	28	1.85714	0.015503	11.3828	10.0356	0.0185407	0.0258945	1.15e-07	6.54e-07	0.883113	0.0248083	1.95863	0.0633972	3	4	0.00618023	0.00647363	0.0280919	0.0323681	67.2727	75.5	0.574379	0.613552	6.95411	5.62282	0.000109205	0.000145306	0.000173181	0.000264497	0.000103811	0.000135545	0.120127	0.117509	7.998	43.3929
	4.6e-06	9.2e-06	11.45	28.2	19.5	29.1	3	0.0121608	18.8742	9.95029	0.0173066	0.0138915	1.41e-07	4.15e-07	1.77147	0.0633434	2.29536	0.0421773	3	3	0.00576888	0.00463051	0.0357575	0.018375	80.9917	64.0212	0.742706	0.521542	3.10966	5.17272	0.000191275	7.59e-05	0.000148629	0.000185265	0.000191811	0.000158069	0.186809	0.142063	18.6933	22.4838
	3.1e-06	1.2e-05	11.45	28.3	19.5	29.3	4.87097	0.00863465	16.2942	16.0127	0.0146987	0.0096701	4.66e-08	2.99e-07	1.02253	0.0295865	2.04939	0.0199777	3	3	0.00489958	0.00322337	0.0289345	0.00974808	58.2677	52.8226	0.633896	0.302799	8.9268	6.00481	0.000102683	0.000192174	0.000161683	4.42e-05	0.000196458	0.000187413	0.203424	0.219094	25.0777	-51.6715
	9.5e-06	2.65e-05	11	28.4	18	28.4	3.78947	0.0168654	9.87387	0.466048	0.0233981	0.0139963	2.17e-07	1e-06	0.974937	0.0303347	2.03211	0.0261416	4	3	0.00584952	0.00466544	0.0311145	0.0128643	71.2766	74.6324	0.589499	0.683138	6.38584	2.59719	0.000106325	0.000152026	0.000111794	0.000123712	0.000169391	0.000110358	0.139791	0.102607	34.9547	-1.13318
	6.2e-06	1.9e-05	11	27.9	17	28.2	4.06452	0.0143413	9.43672	3.91893	0.0141843	0.0177156	9.49e-08	1.13e-06	1.07866	0.0316117	2.53711	0.039846	3	4	0.0047281	0.00442889	0.0293064	0.0157053	66.9421	60.6383	0.694164	0.582071	10.2956	5.68354	7.75e-05	0.000122919	0.000197033	0.000145767	0.000239517	0.000177352	0.142042	0.121246	34.6283	12.1534
	4.1e-06	2.1e-05	11	27.9	18	28	6.12195	0.00939551	10.088	-0.24192	0.0225157	0.0116121	8.96e-08	5.6e-07	0.970335	0.0300107	1.95946	0.0190884	4	3	0.00562892	0.00387069	0.0309281	0.00974168	65.9341	62.0805	0.480469	0.451741	10.8716	8.73244	0.000120676	0.000133855	0.000119539	0.000126804	0.000124898	0.000124299	0.173022	0.125569	35.2848	40.288
	2.01e-05	2.06e-05	10.75	28.3	15.75	28.4	2.02488	0.0273174	6.15597	8.28415	0.0222291	0.0197682	5.22e-07	1.51e-06	1.16855	0.0373216	1.91427	0.0359711	3	3	0.0074097	0.00658939	0.0319384	0.0187911	63.2184	68.0608	0.482831	0.63877	9.06504	4.482	0.00017685	6.35e-05	0.000203972	0.000182094	0.000149759	0.000113466	0.107968	0.0975961	39.0083	10.9877
	2.51e-05	2.54e-05	10.75	28.3	16.75	28.7	2.01195	0.0337718	11.2531	3.91906	0.0252842	0.0230091	6.05e-07	1.82e-06	0.953571	0.0230941	1.56797	0.0285425	3	3	0.00842805	0.00766971	0.0242185	0.0182034	76.2452	66.1392	0.57304	0.379138	3.29729	14.8439	0.000146255	9.25e-05	8.6e-05	0.000170618	0.00015226	0.000145846	0.0793889	0.0746943	32.155	44.9288
	2.29e-05	4.37e-05	10.75	28.6	16.75	28.6	2.9083	0.0297524	16.2634	0.836133	0.0189334	0.0215712	4.32e-07	2.68e-06	0.996355	0.0269491	1.91879	0.0229947	3	4	0.00631113	0.0053928	0.0270477	0.011984	61.1429	54.2222	0.301106	0.23522	10.3653	8.20115	7.66e-05	0.000195345	0.000232719	6.12e-05	0.000253582	0.00019458	0.108922	0.0705884	32.038	37.7343
	8.6e-06	1.66e-05	10.75	28.6	14.75	28.8	2.93023	0.0162182	14.1058	3.0625	0.0215762	0.0145703	2.12e-07	4.92e-07	1.14276	0.0378165	1.38902	0.0144561	3	3	0.00719207	0.00485678	0.0330924	0.0104074	75.4601	61.4286	0.573532	0.348567	6.70965	7.24643	0.000167789	0.000123714	0.000109421	1.95e-05	0.000315307	0.000129812	0.116699	0.0933955	18.1329	-32.7559
	5.9e-06	1.15e-05	10.5	27.7	16.75	28.9	2.94915	0.0128199	13.1516	7.17273	0.0166013	0.0132942	1.16e-07	4.29e-07	1.18613	0.0341863	1.94466	0.0284722	3	3	0.00553377	0.00443141	0.0288217	0.0146412	59.7222	63.8767	0.582048	0.371325	9.21515	7.46862	9.9e-05	9.57e-05	0.000158288	0.00010656	0.000194962	0.000129581	0.136367	0.109687	13.327	14.9862
	2.14e-05	3.77e-05	9.5	28.2	15.5	27.6	2.76168	0.0297567	9.51042	3.55016	0.0259969	0.0169905	5e-07	2.41e-06	0.899443	0.0315983	2.49744	0.0357177	3	3	0.00866565	0.00566349	0.035131	0.0143017	60	61.2795	0.496191	0.636498	15.2171	4.63827	0.000127769	0.000103299	9.67e-05	0.000106447	0.000187248	0.000136368	0.117726	0.071552	60.0992	3.53629
	1.71e-05	1.76e-05	9.5	27.9	15.5	28.2	2.02924	0.0240722	9.68153	10.8128	0.0222313	0.0181704	3.74e-07	8.79e-07	0.98299	0.027046	1.43618	0.0256849	3	3	0.00741044	0.0060568	0.027514	0.0178842	76.7327	64.5669	0.672587	0.684159	4.30644	6.61442	0.000135098	0.000145265	9.26e-05	0.000118288	0.000148455	0.000108442	0.0935542	0.100923	25.9799	10.3677
	2.6e-06	8e-06	9.5	28.1	15.5	28.9	4.07692	0.00792413	11.2649	5.5232	0.015833	0.0122549	4.83e-08	2.7e-07	1.17399	0.0380896	2.07493	0.0326001	3	3	0.00527767	0.00408498	0.0324447	0.0157115	68.8525	66.6667	0.564492	0.572867	11.2468	6.18201	0.000104392	0.000192246	0.000143821	0.000123524	0.000161274	0.000125198	0.215934	0.188041	32.036	53.674
	2.68e-05	5.36e-05	11.5	28.5	16.5	28.5	3	0.0310851	12.1019	6.12179	0.025077	0.0170823	8.09e-07	3.27e-06	1.20426	0.0403734	2.40323	0.0276635	3	3	0.00835901	0.00569409	0.0335254	0.011511	68.984	57.6819	0.335177	0.542053	7.36072	3.50296	0.000175908	9.56e-05	0.000125208	9.25e-05	0.000175255	0.000173577	0.140475	0.139166	34.3804	-11.5783
	4.5e-06	1.36e-05	11.5	28.9	16.5	28.5	4.02222	0.0114066	13.1863	5.07129	0.0169325	0.0122404	8.21e-08	6.93e-07	1.07772	0.0302128	3.18262	0.0429037	3	3	0.00564417	0.00408014	0.0280339	0.0134806	78.1457	66.5198	0.733497	0.405085	4.69152	5.37851	9.7e-05	0.000221086	0.000156843	0.000149397	0.00017038	0.000128902	0.168905	0.154999	20.7586	27.6839
	3.2e-06	1.52e-05	11.5	28.9	16.5	28.3	5.75	0.00951072	14.7609	3.11063	0.0140565	0.0111836	4.23e-08	4.96e-07	0.941344	0.0295357	2.38291	0.0336482	3	3	0.0046855	0.00372785	0.0313761	0.0141207	63.3929	59.596	0.11558	0.476264	12.4665	8.06141	4.12e-05	0.00019716	0.000141996	0.000127385	0.000159223	0.000128309	0.17161	0.145604	-20.1407	34.7353
	2.38e-05	7.15e-05	11.5	27.4	17	28.1	4.0042	0.0307328	10.7756	13.4682	0.0219014	0.013475	5.74e-07	3.32e-06	1.10179	0.0285911	2.60032	0.0222897	3	3	0.00730048	0.00449168	0.0259496	0.00857191	72.0379	57.5064	0.477637	0.445275	5.20055	5.60809	0.000143338	0.000115537	7.74e-05	4.92e-05	0.000277355	0.000226956	0.127382	0.161772	13.8044	89.4645
	1.76e-05	5.31e-05	11.5	28	17	28.5	4.01705	0.0229824	16.2465	4.65353	0.0180533	0.017316	3.42e-07	2.26e-06	1.07687	0.0235935	1.8756	0.0243828	3	3	0.00601776	0.00577199	0.0219093	0.013	56.3107	54.0541	0.133308	0.361199	11.7514	8.55675	0.000101366	0.000149468	0.000133124	0.000152823	0.000187929	0.000130475	0.196109	0.157258	53.057	16.0049
	1.64e-05	3.3e-05	11.5	27.9	17	28.4	3.0122	0.0264321	11.0551	7.3921	0.0179816	0.0206804	2.92e-07	2.09e-06	0.98986	0.0236693	2.07157	0.0302549	3	4	0.00599388	0.0051701	0.0239117	0.0146048	64.3617	53.6723	0.512153	0.308671	11.6487	8.58709	4.54e-05	0.00020126	0.000232559	5.15e-05	0.000250206	0.000165086	0.0796521	0.0843504	32.2071	59.3318
	6.6e-06	2.56e-05	11.5	27.8	17	28.1	4.87879	0.0143524	10.1897	10.5233	0.0227366	0.0127754	1.53e-07	8.13e-07	1.01933	0.0295615	2.00112	0.0199728	4	3	0.00568415	0.00425847	0.0290008	0.00998079	71.9388	50.9375	0.566578	0.402589	7.86605	7.20477	8.4e-05	0.000177692	0.000172996	6.09e-05	0.000255214	0.000156067	0.246798	0.17278	18.1614	21.2935
	1.85e-05	1.92e-05	11	28.34	17	28.5	2.03784	0.0277932	11.3908	8.44715	0.0205562	0.0189899	4.12e-07	1.58e-06	1.08385	0.031292	2.23091	0.0407353	3	3	0.00685207	0.00632997	0.0288711	0.0182595	67.9775	65.7692	0.489876	0.583025	8.79192	6.37923	8.21e-05	0.000190053	0.000132179	0.000168996	0.00021682	0.000169142	0.0820891	0.0933939	-4.95537	32.9435
	3.21e-05	3.23e-05	10.5	27.7	15.75	28.2	2.00623	0.0368232	11.3417	7.82937	0.0267259	0.0217001	8.5e-07	2.82e-06	0.990331	0.0279193	2.05301	0.0396358	3	3	0.00890864	0.00723338	0.0281919	0.0193062	67.9325	68.3274	0.30089	0.679127	8.46556	5.59723	0.000174035	0.00014213	0.00011845	0.000238443	0.000126979	0.00011172	0.0839513	0.0782863	55.3609	23.0909
	8.1e-06	2.44e-05	10.5	27.5	15.75	28.3	4.01235	0.0164686	14.0872	1.13175	0.0271502	0.0209669	2.25e-07	1.39e-06	1.02345	0.0303349	2.06037	0.0307689	4	4	0.00678754	0.00524173	0.0296399	0.0149337	74.2358	64.9573	0.633226	0.603024	6.78227	7.23996	0.000140403	0.00011646	9.43e-05	0.000142348	0.000181267	0.000171063	0.11376	0.103284	40.1798	54.1399
	4.2e-06	1.69e-05	10.5	28.3	15.75	28.3	5.02381	0.0107706	13.5479	6.91901	0.0134002	0.0138285	5.11e-08	6.16e-07	0.907091	0.019112	2.1418	0.0317788	3	3	0.00446675	0.0046095	0.0210696	0.0148374	59.7484	63.5193	0.357861	0.56213	9.62835	6.02591	6.85e-05	9.44e-05	0.000140891	0.000165391	0.000227168	0.000140018	0.167279	0.154835	33.7965	21.2798
	3.25e-05	6.3e-05	11.25	27.8	17	27.8	2.93846	0.0379795	7.93753	11.5797	0.0288135	0.0296227	9.44e-07	6.19e-06	1.00839	0.0225583	2.20595	0.0311767	4	5	0.00720338	0.00592454	0.0223708	0.014133	58.0745	50.3817	0.187153	0.282592	10.4111	6.15286	0.000107727	0.000100837	0.000149067	4.64e-05	0.000276779	0.000267571	0.0818843	0.110161	84.0602	-34.5753
	2.56e-05	4.9e-06	11.25	28.2	17	28	1.19141	0.0331552	10.6864	9.07847	0.022638	0.030587	7.38e-07	1.02e-06	1.27361	0.0450497	1.13401	0.0322361	3	4	0.00754599	0.00764676	0.0353718	0.0284266	56.25	56.5056	0.24646	0.412988	12.5921	12.3514	0.000126568	0.000231354	0.000184299	0.000142589	0.0001792	0.000153236	0.0941407	0.0946887	47.1461	47.4851
	2.23e-05	8.3e-06	11.25	28	17	28	1.3722	0.0304207	12.9509	11.7455	0.0296896	0.0286075	9.33e-07	9.88e-07	1.40924	0.0430452	1.16236	0.0252676	4	4	0.0074224	0.00715188	0.0305449	0.0217382	65.0206	66.5653	0.54518	0.622783	8.86628	8.0887	0.00012044	0.000182916	9.64e-05	0.000132097	0.000213644	0.00013719	0.100805	0.0917549	22.5778	27.5584
	2.1e-06	6.1e-06	11.25	28.3	17	28.1	3.90476	0.00704584	14.6288	2.14553	0.0227781	0.0131996	5.59e-08	1.7e-07	1.1686	0.0334404	1.59395	0.0123472	5	5	0.00455562	0.00263993	0.0286157	0.00774627	70.8543	55.8685	0.670366	0.409417	5.73634	6.30121	9.56e-05	0.000107143	0.000153928	2.45e-05	0.000236309	0.000215854	0.246306	0.143865	10.3644	-1.57746
	2e-06	8.1e-06	11.25	28.6	17	28.1	5.05	0.00662707	12.4793	-0.0443231	0.0207177	0.011064	4.17e-08	2.08e-07	1.00576	0.0244566	1.86428	0.0137144	5	4	0.00414354	0.00276601	0.0243166	0.0073564	69.9531	53.4574	0.547794	0.482841	7.13652	5.54807	8.01e-05	0.000103108	0.000143071	1.58e-05	0.000285951	0.000174318	0.25095	0.497475	10.8243	-0.203826
	1.76e-05	5.2e-06	11	28.2	17.25	28.1	1.29545	0.0268937	15.228	14.7729	0.0199692	0.0208298	3.58e-07	6.68e-07	1.01743	0.0263177	1.43183	0.0277182	3	3	0.00665639	0.00694325	0.0258668	0.0193585	58.5492	72.8625	0.207618	0.618957	12.7299	3.21917	7.33e-05	0.000231641	0.000122306	0.000127536	0.000155703	0.00011535	0.111216	0.12416	36.4239	-5.25768
	1.01e-05	3.5e-06	11	28.1	17.25	28.2	1.34653	0.018584	13.3822	15.2174	0.0226456	0.0180215	2.3e-07	2.44e-07	1.00532	0.0288911	1.05724	0.0278553	4	3	0.0056614	0.00600716	0.0287381	0.0263472	63.4518	78.9474	0.406782	0.414691	9.14542	5.89131	7.26e-05	0.000190525	0.000144722	4.5e-05	0.000259085	0.000267096	0.127365	0.115901	23.8835	30.1827
	3.6e-06	3.5e-06	11	28	16	28.6	1.97222	0.0105621	13.9603	8.18746	0.0221443	0.0211283	8.78e-08	2.08e-07	1.10135	0.0342538	1.49321	0.0355281	4	4	0.00553608	0.00528206	0.0311016	0.0237931	76.4045	74.3243	0.501617	0.562826	5.14556	3.18751	0.000102602	0.000207939	0.000145016	0.000115812	0.00019163	0.000105789	0.210625	0.140435	26.2396	22.4823
	3.5e-06	7.1e-06	11	27.8	16	28.6	3.02857	0.00954429	12.7465	6.23097	0.0177653	0.0174821	6.31e-08	2.71e-07	1.01412	0.0254465	1.52196	0.0191142	4	5	0.00444134	0.00349641	0.0250923	0.012559	65.5367	59.1954	0.37328	0.249627	7.11715	6.63989	5.61e-05	0.00014104	0.000139835	4.02e-05	0.000215776	0.00020849	0.229757	0.169925	1.22318	14.4868
	5.3e-06	5.4e-06	13	28.3	16	28.5	2.01887	0.0141044	12.2206	1.79428	0.0234195	0.0253517	1.1e-07	4.24e-07	0.884627	0.0228166	1.59319	0.0378186	4	4	0.00585487	0.00633794	0.0257924	0.0237376	67.8414	68.1648	0.681366	0.49936	7.44179	5.55961	0.000115582	0.000172451	0.000123443	0.000183618	0.000133072	0.000111212	0.127473	0.135172	20.2356	34.8254
	1.7e-06	3.3e-06	13	28.1	16	28.1	2.94118	0.00621255	10.5741	-10.2953	0.0166642	0.0149255	2.79e-08	1.28e-07	0.985818	0.0229439	1.79336	0.0252518	4	4	0.00416605	0.00373138	0.023274	0.0140807	69.8324	71.6981	0.682801	0.579186	6.06672	5.3415	7.98e-05	0.000215365	0.000109349	7.47e-05	0.000135741	0.000157678	0.215355	0.160965	19.9265	34.7917
Min	1.7e-06	3.3e-06	9.5	26.8	14.75	19.1	1.19141	0.00621255	4.66035	-10.2953	0.0134002	0.0096701	2.79e-08	1.28e-07	0.872186	0.0181831	1.05724	0.0123472	3	3	0.00414354	0.00263993	0.0208478	0.0071922	54.5455	50.3467	0.0681547	0.0672612	3.10966	2.59719	4.12e-05	6.35e-05	7.74e-05	1.58e-05	0.000103811	7.7e-05	0.0793889	0.0705884	-20.1407	-57.2805
Max	3.25e-05	7.15e-05	14.5	29.3	19.5	29.3	6.12195	0.0379795	21.2817	16.0127	0.0364866	0.0356806	9.66e-07	6.19e-06	1.77147	0.0678368	3.18262	0.0633972	5	6	0.00890864	0.00766971	0.0409155	0.0323681	80.9917	78.9474	0.742706	0.729235	15.2171	14.8439	0.000191275	0.000246491	0.000232719	0.000281287	0.000315307	0.000267571	0.25095	0.497475	84.0602	89.4645
Mean	1.27731e-05	2.33673e-05	11.3827	28.0969	16.7471	27.9288	3.22179	0.0201519	12.5015	5.53771	0.0224014	0.0189223	3.40435e-07	1.4501e-06	1.08185	0.0319379	1.96571	0.0296581	3.57692	3.71154	0.00629525	0.00510493	0.0290834	0.0155247	67.1807	62.3711	0.48034	0.480267	8.46392	6.52643	0.00011003	0.000152467	0.000139803	0.000113578	0.000193908	0.000155766	0.139739	0.121733	26.0007	19.1985

## Sheet: Variable explanation
Variable name	Meaning	Units
mass_ant	Mass of the ant	kg
mass_load	Mass of the transported load	kg
time_u	Travel duration (unloaded)	s
temp_u	Temperature (unloaded)	°C
time_l	Travel duration (unloaded)	s
temp_l	Temperature (loaded)	°C
load_ratio	(ant mass + load mass)/ant mass	NA
l_corps	Body length (head + thorax + abdomen)	m
angle_u	Angle between horizontal X axis and the line linking the gaster and head CoMs (unloaded)	°
angle_l	Angle between horizontal X axis and the line linking the gaster and head CoMs (loaded)	°
distance_lineaire_parcourue_u	Distance travelled (unloaded)	m
distance_lineaire_parcourue_l	Distance travalled (loaded)	m
travail_mecanique_u	Mechanical work (unloaded)	J
travail_mecanique_l	Mechanical work (loaded)	J
travail_mecanique_div_masse_distance_u	Mass specific mechanical work (unloaded)	J.kg-1.m-1
travail_mecanique_div_masse_temps_u	Mass specific mechanical power (unloaded)	W.kg-1
travail_mecanique_div_masse_distance_l	Mass specific mechanical work (unloaded)	J.kg-1.m-1
travail_mecanique_div_masse_temps_l	Mass specific mechanical power (loaded)	W.kg-1
nombre_foulees_u	Number of strides (unloaded)	NA
nombre_foulees_l	Number of strides (loaded)	NA
longueur_foulee_u	Stride length (unloaded)	m
longueur_foulee_l	Stride length (loaded)	m
vitesse_u	Locomotory rate (unloaded)	m.s-1
vitesse_l	Locomotory rate (loaded)	m.s-1
percentage_congruity_u	Percentage congruity between Ek and Ep - see Ahn et al. 2004 (unloaded)	%
percentage_congruity_l	Percentage congruity between Ek and Ep - see Ahn et al. 2004 (loaded)	%
coef_cor_u	Pearson correlation coefficient between Ek and Ep (unloaded)	NA
coef_cor_l	Pearson correlation coefficient between Ek and Ep (loaded)	NA
percentage_recovery_u	Energy recovered through the pendulum-like ocillations of the COM - see Cavagna et al. 1976 (unloaded)	%
percentage_recovery_l	Energy recovered through the pendulum-like ocillations of the COM - see Cavagna et al. 1976 (loaded)	%
amplitude_z_u	Amplitude of z position of the COM (unloaded)	m
rmse_pos_z_u	RMSE of z position of the COM (unloaded)	m
rmse_vit_norm_u	RMSE of nromalized locomotory rate (unloaded)	m.s-1
amplitude_z_l	Amplitude of z position of the COM (loaded)	m
rmse_pos_z_l	RMSE of z position of the COM (loaded)	m
rmse_vit_norm_l	RMSE of nomalized locomotory rate (loaded)	m.s-1
mean_z_BL_u	Mean z position of the COM (unloaded)	body length
mean_z_BL_l	Mean z position of the COM (loaded)	body length
dephasage_stat_kin_sur_pot_u	Phase lag between Ek and Ep (unloaded)	°
dephasage_stat_kin_sur_pot_l	Phase lag between Ek and Ep (loaded)	°
